# Supplementary material
Source: PubMed Central journal article supplement (PMC4421047)
Supplement: AEM.00572-15_zam999116294so1.pdf [file AEM.00572-15_zam999116294so1.pdf]

## Supplementary Information

1  
2  
3

**Table S1.** Primers used in this study.

| Function                                | Primers        | Sequence (5'-3') <sup>a</sup>                                 | T <sub>m</sub><br>(°C) | Notes                                  |
|-----------------------------------------|----------------|---------------------------------------------------------------|------------------------|----------------------------------------|
| <b>5'RACE PCR</b>                       |                |                                                               |                        |                                        |
|                                         | JS2            | ccatcttttcatgagcagctt                                         | 53,9                   | cDNA of AbiQ <sub>op</sub> transcripts |
|                                         | AbiQFwd        | ttttacgaatgacgttaagattc                                       | 49,3                   | Control+, cDNA                         |
|                                         | AbiQRev        | CAGAATTCGAATTCcgaagaggattattatattgcc                          | 50,9                   | Control+/-, cDNA                       |
|                                         | PolyC          | GACTCGAGTCGACATCGAccccccccccccccc                             | 73,8                   | PCR RACE-AbiQ                          |
|                                         | M13Fwd         | gtaaacgacggccagt                                              | 52,6                   | MCS of pBS-KS                          |
|                                         | M13Rev         | caggaaacagctatgac                                             | 47                     | MCS of pBS-KS                          |
| <b>Revertant (<i>antiQ</i> repeats)</b> |                |                                                               |                        |                                        |
|                                         | Mut1.8Fwd      | attactttatacctttgcaagctacaaaaaggggaa                          | 59,6                   | Revertant 1.8R                         |
|                                         | Mut1.8Rev      | ttcccctttttagcttgacaaggtataaaagta                             | 59,6                   | Revertant 1.8R                         |
|                                         | Mut3.8Fwd      | attactttatacctttgcaagctacaaaaaggggaa                          | 61                     | Revertant 3.8R                         |
|                                         | Mut3.8Rev      | ggtcccctttttagcttgacaaggtataaaagta                            | 61                     | Revertant 3.8R                         |
| <b>Point mutant (<i>antiQ</i>)</b>      |                |                                                               |                        |                                        |
|                                         | antiQ(A13C)Fwd | gatattataattgtaaggaatccaagccatcgttggaaatgataaaatggagtatcc     | 63,5                   | Mutant A13C                            |
|                                         | antiQ(A13C)Rev | ggatactccaattttatcaattccaacgatggcttggatattccttacaattataatc    | 63,5                   | Mutant A13C                            |
|                                         | antiQ(A24C)Fwd | gatattataattgtaaggaatccaagccatagttggaaatgataaaatggagtatcc     | 63,5                   | Mutant A24C                            |
|                                         | antiQ(A24C)Rev | ggatactccaattttagcaattccaactatggcttggatattccttacaattataatc    | 63,5                   | Mutant A24C                            |
|                                         | antiQ(T25C)Fwd | gatattataattgtaaggaatccaagccatagttggaaatgataaaatggagtatcc     | 63,5                   | Mutant T25C                            |
|                                         | antiQ(T25C)Rev | ggatactccaattttgcaattccaactatggcttggatattccttacaattataatc     | 63,5                   | Mutant T25C                            |
|                                         | antiQ(A26C)Fwd | gatattataattgtaaggaatccaagccatagttggaaatgataaaatggagtatcc     | 65                     | Mutant A26C                            |
|                                         | antiQ(A26C)Rev | ccaactatggcttggatactccaattgatcaattccaactatggcttggatattccttac  | 65                     | Mutant A26C                            |
|                                         | antiQ(A28C)Fwd | gatattataattgtaaggaatccaagccatagttggaaatgataaaatggagtatcc     | 65                     | Mutant A28C                            |
|                                         | antiQ(A28C)Rev | ccaactatggcttggatactccaattgatcaattccaactatggcttggatattccttac  | 65                     | Mutant A28C                            |
|                                         | antiQ(G32A)Fwd | gatattataattgtaaggaatccaagccatagttggaaatgataaaatggagtatcc     | 65                     | Mutant G32A                            |
|                                         | antiQ(G32A)Rev | ccaactatggcttggatactccaattgatcaattccaactatggcttggatattccttaca | 65                     | Mutant G32A                            |
| <b>Vector (MCS)</b>                     |                |                                                               |                        |                                        |
|                                         | pNZ-F          | aatgtcactaacctgccccg                                          | 57,4                   | MCS of pNZ123                          |
|                                         | pNZ-R          | cattgaacatgctgaagagc                                          | 52,1                   | MCS of pNZ123                          |

4  
5  
6

<sup>a</sup> Capital letters, 5' flanking region. Dotted underline, recognition site of restriction enzyme. Solid underline, first repetition of *antiQ* (35nt). Bold letters, mutated nucleotides.

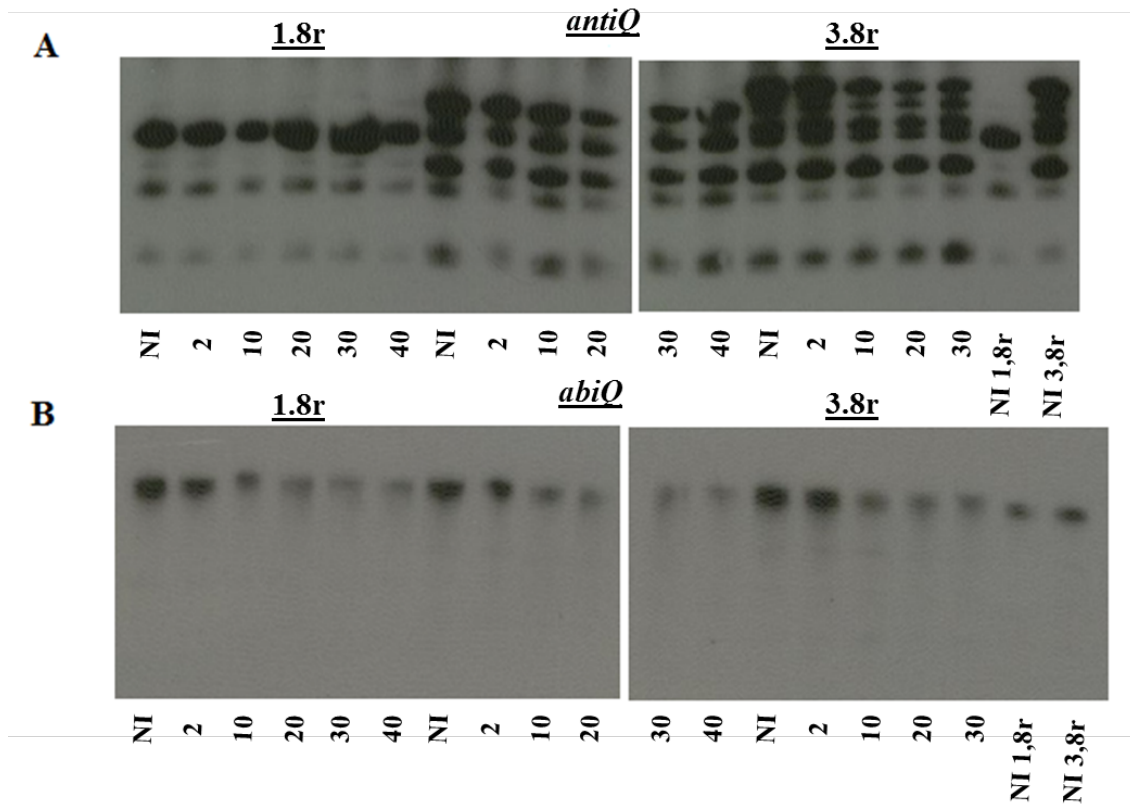

7

8 **Figure S1.** Northern blot experiment targeting *antiQ* (Panel A) and *abiQ* (Panel B) transcripts  
 9 from *L. lactis* IL1403 AbiQ wild-type and mutants (1.8 and 3.8 repetitions) during phage  
 10 infection by P008.

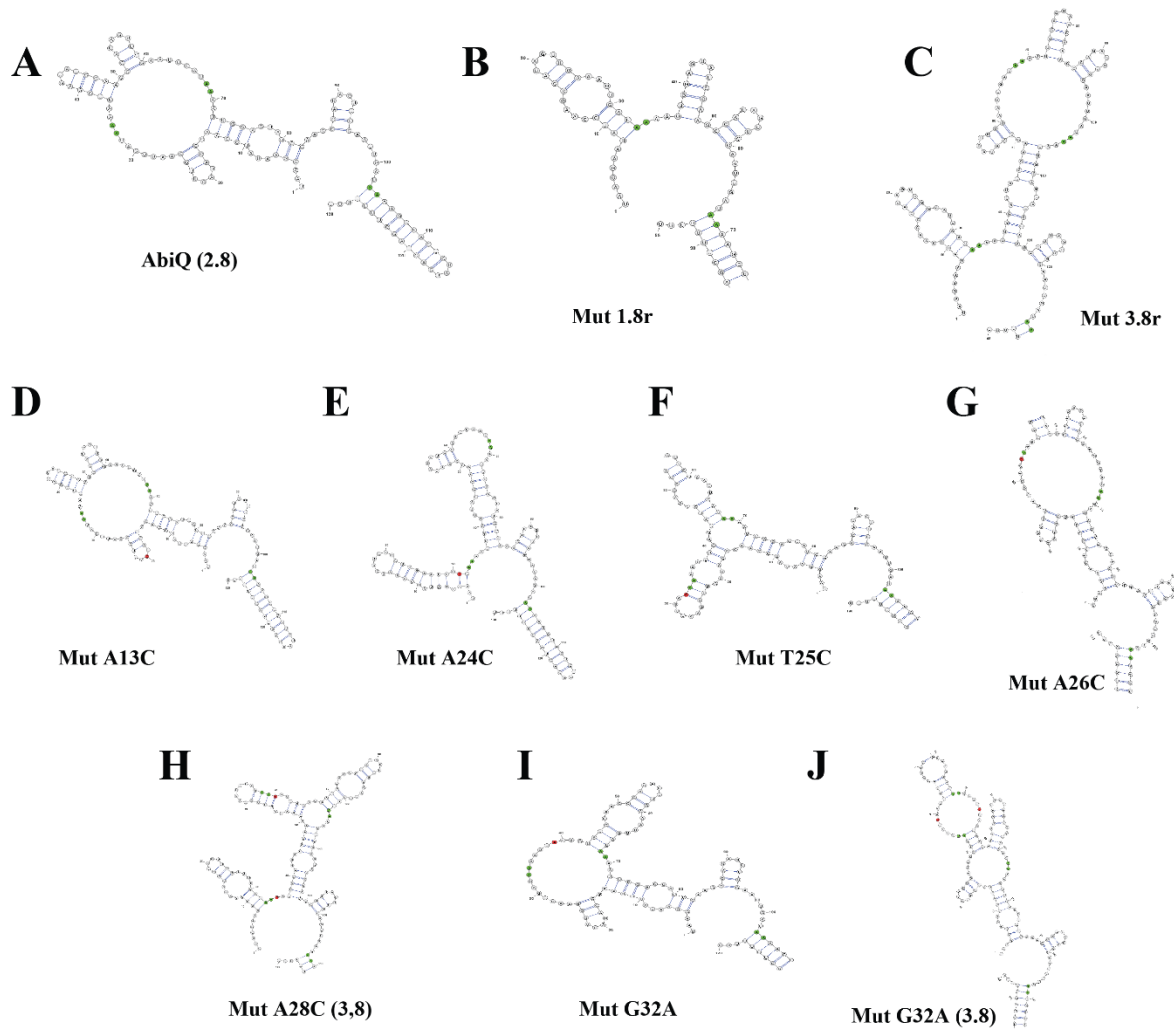

11

12

13 **Figure S2.** Comparison of the secondary structure of *antiQ* non-coding RNA (A), mutants with  
 14 variable numbers of repeats (B, C) and point mutations mutants (D-J). RNAfold software (mode:  
 15 mfe-partition function) has been used in combination with VARNA visualization software to  
 16 characterize all the complete *antiQ* RNA structures (1, 2). Green nucleotides surround the ABIQ  
 17 cleavage site and the specifically mutated nucleotides are shown in red.

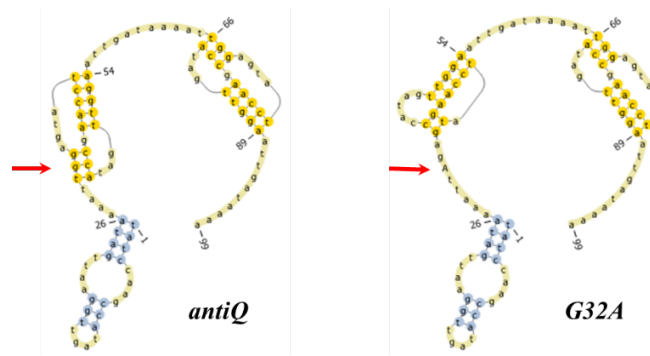

18

19

20 **Figure S3.** Comparison of pseudoknot structure of *antiQ* non-coding RNA (left) and the G32A  
21 mutants (right). Pseudoknot structure analysis was performed using pKnotsRG software and the  
22 visualization software Pseudoviewer 3.0 (3-5). To simplify analysis, only the nucleotides of the  
23 repeats (99 nt) were used as the sequence and uracil was replaced by thymine.

24  
25  
26  
27  
28  
29  
30  
31  
32  
33  
34  
35  
36  
37

## References

1. **Gruber AR, Lorenz R, Bernhart SH, Neuböck R, Hofacker IL.** 2008. The Vienna RNA websuite. *Nucleic Acids Res.* **36**:W70-74.
2. **Darty K, Denise A, Ponty Y.** 2009. VARNA: Interactive drawing and editing of the RNA secondary structure. *Bioinformatics* **25**:1974-1975.
3. **Reeder J, Steffen P, Giegerich R.** 2007. pknotsRG: RNA pseudoknot folding including near-optimal structures and sliding windows. *Nucleic Acids Res.* **35**:W320-324.
4. **Byun Y, Han K.** 2006. PseudoViewer: web application and web service for visualizing RNA pseudoknots and secondary structures. *Nucleic Acids Res.* **34**:W416-422.
5. **Byun Y, Han K.** 2009. PseudoViewer3: generating planar drawings of large-scale RNA structures with pseudoknots. *Bioinformatics* **25**:1435-1437.
